# Supplementary material
Source: PubMed Central journal article supplement (PMC5843469)
Supplement: NIHMS946768-supplement-Supplemental_data.pdf [file NIHMS946768-supplement-Supplemental_data.pdf]

## Supplementary Data

*The Optum™ Impact™ National Managed Care Benchmark Database* is a comprehensive, de-identified U.S. healthcare claims database that is representative of the non-elderly (65 years old and younger), insurance-carrying US population. The data are collected from 46 healthcare insurance providers serving members across nine census regions since 1997. By 2011, the database had accumulated claim records for 105.2 million insured members, based on approximately 15,000 ICD9 disease or procedure codes (abbreviated for the International Classification of Diseases, 9th Edition, published by the World Health Organization, WHO). We chose to study the claims from 2000 to 2011 for stabilized data volume and quality. We then adopted the ICD9 grouping methods developed by Denny et al <sup>1</sup> in their PheWAS study to group all ICD9 codes into approximately 1,700 meaningful clinical categories. This allowed us to calculate disease prevalence, treatment cost, and our newly defined Health Research Opportunity Index (Health ROI).

*University of Chicago Hospital Data* comprises de-identified medical records representing both outpatients and inpatients from the South Chicago area in 2011. It represents 146,989 unique patients; among them 120,303 (81.8%) are at the age of 65 or under and 26,686 (17.8%) are older than 65. The summary statistics of the sampled population is listed in Supplemental Table 3. The kernel density plot in Figure 2B shows that the ROIs computed for older and younger populations are very tightly correlated (Spearman's rank correlation coefficient equals 0.87 with p value ~0). Kernel density estimation is a non-parametric data smoothing technique where inferences about the population are made, based on a finite data sample <sup>2,3</sup> and is implemented using Seaborn statistical data visualization package (<http://stanford.edu/~mwaskom/software/seaborn/index.html>).

*The National (Nationwide) Inpatient Samples (NIS)* is the largest all-payer inpatient care database in the United States. Each year of the NIS provides information on approximately 8 million inpatient stays from about 1,000 hospitals participating in the Healthcare Cost and Utilization Project (HCUP). To compare with the University of Chicago Hospital Data and the Optum Database, we analyzed the NIS data for 2011 too. Summary statistics for the NIS population are listed in Supplemental Table 4 and the kernel density plot is shown in Figure 2: The ROIs for patients of 65 and below and those over 65 correlate at 0.59 with p value less than  $10^{-124}$ . NIS data does not contain complete information about annual treatment costs. So when calculating health ROI from NIS data, we used disease incidence in the NIS and average annual treatment costs from Optum, based on the strong but reasonable assumption that it costs the same price to treat disease in those under and over 65.

*The World Health Organization (WHO) data:* The WHO publishes global burden of diseases based on the number of deaths, Years Lost due to Disability (YLD), Years of Life Lost (YLLs), and Disability-Adjusted Life Year (DALYs) since 1990 <sup>4</sup>. We compared the latest burden of disease estimates in the United States published by WHO (2010) alongside our insurance and hospital-based burden of disease estimates (e.g., prevalence and treatment cost) in the same year from *The Optum™ Impact™ National*

*Managed Care Benchmark Database* for the 93 disease categories in both. Results are summarized in Table 1 and discussed in the main manuscript.

*MEDLINE/PubMed data:* We downloaded all Medical Subject Heading (MeSH)-indexed abstracts in English from the MEDLINE database (via the PubMed query interface), the biomedical publication database maintained by the United States National Library of Medicine (NLM) for each year from 2000 until 2011. Then we used the number of publications annotated by each Medical Subject Heading (MeSH) disease term to approximate attention received from the biomedical research community in each disease area. Our assumption was that total summary numbers most closely reflect the focus and attention of the entire research community. We also performed an additional experiment that restricted this sample to only research oriented articles, including original journal articles, clinical trials, and meta-analyses. We find that results from this more limited sample are broadly the same. As research articles take a dominant share in MEDLINE publications, the correlation between English *research* articles and all English publications related to specific diseases is higher than 0.999 for each year between 2000 and 2011 (see Supplemental Table 2). Therefore we kept other publication types, such as books, case reports, evaluation studies, guidelines, technical reports and lectures in the analysis. In some cases, those non-research publication types have a bigger impact on individual scientists and healthcare practitioners.

*Clinical trial database:* [clinicaltrials.gov](http://clinicaltrials.gov) is a mandated clinical trial registration maintained by the United States National Library of Medicine. We downloaded its aggregated, MeSH-indexed database extract from the website of Clinical Trials Transformation Initiative (<http://www.ctti-clinicaltrials.org>). Similarly we used the number of clinical trials related to a specific disease to approximate feasibility and popularity of carrying out clinical research in each disease area in a given year during 2000 and 2011. We indexed these trials in our analysis by trial start date.

*NIH funding information for 83 disease categories.* The U.S. National Institutes of Health (NIH) publishes its annual support level since 2009 for various research, condition, and disease categories based on grants, contracts, and other funding mechanisms at [http://report.nih.gov/categorical\\_spending.aspx](http://report.nih.gov/categorical_spending.aspx). We identified the same data for the Fiscal Year 2003- 2008 in earlier NIH publications and manually mapped 83 clearly defined diseases according to the PheWAS groupings of ICD9 codes<sup>1</sup>. We did not include additional NIH support funded from the American Recovery and Reinvestment Act accounts in that calculation, as it was only one-time support for the years 2009 and 2010.

*Mapping disease terminologies.* The data sources described above use different terminologies to annotate disease. In order to facilitate the integration analysis, we further mapped the PheWAS and MeSH disease names via ICD9, according to a refined method developed by *J. Cimino* and colleagues<sup>5</sup>. Not all PheWAS terms were mapped to MeSH terms: 371 out of 1,722 (or 21.5%) were excluded. Major reasons include (1) some PheWAS terms are not diseases or phenotypes strictly speaking, such as 'chemotherapy', 'radiotherapy' and 'liver replaced by transplant'; (2) MeSH does not cover diseases at the same granularity as ICD9 and PheWAS; terms such as 'Diabetes

type 2 with ketoacidosis or uncontrolled diabetes' and 'lupus' are missing from MeSH, and (3) some terms were not mapped due to imperfections in the UMLS mapping and semantic types.

### Supplementary Method: Theoretical Method for Estimating the Uncertainty/Variance in Health ROI

$$ROI_d = \log_{10} \left( \prod_{m \in \{M-b\}} \frac{X_{bd}}{X_{md}} \right).$$

Using the Delta method,

$$\begin{aligned} Var(ROI_d) &\approx Var(X_{bd}) \left[ \frac{\partial ROI_d}{\partial X_{bd}} \right]^2 + \sum_m Var(X_{md}) \left[ \frac{\partial ROI_d}{\partial X_{md}} \right]^2 \\ &+ 2 \sum_m \frac{\partial ROI_d}{\partial X_{bd}} \frac{\partial ROI_d}{\partial X_{md}} Cov(X_{bd}, X_{md}) \\ &+ 2 \sum_{\substack{n \in (M-b), \\ m \in (M-b), n \neq m}} \frac{\partial ROI_d}{\partial X_{nd}} \frac{\partial ROI_d}{\partial X_{md}} Cov(X_{nd}, X_{md}), \\ \frac{\partial ROI_d}{\partial X_{bd}} &= \frac{|M| - 1}{X_{bd} \ln(10)}. \end{aligned}$$

In our implementation of the Health ROI,  $M$  includes three factors, namely disease burden, literature and clinical trials. Therefore,

$$\frac{\partial ROI_d}{\partial X_{bd}} = \frac{2}{X_{bd} \ln(10)}.$$

Similarly,

$$\frac{\partial ROI_d}{\partial X_{md}} = -\frac{1}{X_{md} \ln(10)}.$$

$$X_{bd} = p_{bd} C_{bd}.$$

where  $C_{bd}$  is an estimated treatment cost burden of condition  $d$  and  $p_{bd}$  is the relative prevalence or probability of condition  $d$ . Thus the variance of the binomially distributed random variable  $X_{bd}$  would be

$$Var(X_{bd}) \cong \frac{C_{bd}^2 p_{bd} (1 - p_{bd})}{N}$$

where  $N$  is the total number of unique patients described in the dataset and the constant  $C_{bd}$  represents the mean treatment cost associated with a given condition.

Finally,  $Var(X_{md})$  can be estimated using bootstrapping, and

$Cov(X_{bd}, X_{md}) = \rho_{bm}\sqrt{Var(X_{bd})Var(X_{md})}$ , where  $\rho_{bm}$  is an empirical correlation.

Because of the very large sample sizes used in our analysis, the variances of Health ROIs are vanishingly small and thus are not shown in the paper.

**Supplementary Table 1:** Correlation between NIH funding in 83 disease areas and 4 metrics, namely disease burden (measured by total treatment cost in million population), publications, clinical trials, and health ROI.

| Year | Disease Burden                  |                 |                           |                 | Publications                    |                 |                           |                 |
|------|---------------------------------|-----------------|---------------------------|-----------------|---------------------------------|-----------------|---------------------------|-----------------|
|      | Pearson correlation coefficient | <i>p</i> -value | Spearman rank coefficient | <i>p</i> -value | Pearson correlation coefficient | <i>p</i> -value | Spearman rank coefficient | <i>p</i> -value |
| 2011 | 0.019                           | 0.865           | 0.100                     | 0.382           | <i>0.296</i>                    | <i>0.008</i>    | <i>0.677</i>              | <i>0.000</i>    |
| 2010 | 0.029                           | 0.800           | 0.069                     | 0.545           | <i>0.292</i>                    | <i>0.009</i>    | <i>0.597</i>              | <i>0.000</i>    |
| 2009 | 0.031                           | 0.783           | 0.102                     | 0.370           | <i>0.294</i>                    | <i>0.009</i>    | <i>0.606</i>              | <i>0.000</i>    |
| 2008 | 0.013                           | 0.909           | 0.087                     | 0.446           | <i>0.299</i>                    | <i>0.008</i>    | <i>0.587</i>              | <i>0.000</i>    |
| 2007 | 0.028                           | 0.803           | 0.066                     | 0.566           | <i>0.338</i>                    | <i>0.002</i>    | <i>0.600</i>              | <i>0.000</i>    |
| 2006 | 0.036                           | 0.754           | 0.051                     | 0.655           | <i>0.347</i>                    | <i>0.002</i>    | <i>0.606</i>              | <i>0.000</i>    |
| 2005 | 0.039                           | 0.735           | 0.057                     | 0.622           | <i>0.350</i>                    | <i>0.002</i>    | <i>0.636</i>              | <i>0.000</i>    |
| 2004 | 0.045                           | 0.692           | 0.037                     | 0.745           | <i>0.356</i>                    | <i>0.001</i>    | <i>0.607</i>              | <i>0.000</i>    |
| 2003 | 0.062                           | 0.592           | 0.056                     | 0.629           | <i>0.360</i>                    | <i>0.001</i>    | <i>0.653</i>              | <i>0.000</i>    |
| Year | Clinical Trials                 |                 |                           |                 | Health ROI <sup>1</sup>         |                 |                           |                 |
|      | Pearson Correlation Coefficient | <i>p</i> -value | Spearman Rank Coefficient | <i>p</i> -value | Pearson Correlation Coefficient | <i>p</i> -value | Spearman Rank Coefficient | <i>p</i> -value |
| 2011 | <i>0.275</i>                    | <i>0.014</i>    | <i>0.501</i>              | <i>0.000</i>    | <i>-0.223</i>                   | <i>0.048</i>    | <i>-0.302</i>             | <i>0.007</i>    |
| 2010 | <i>0.294</i>                    | <i>0.009</i>    | <i>0.482</i>              | <i>0.000</i>    | -0.198                          | 0.080           | <i>-0.253</i>             | <i>0.024</i>    |
| 2009 | <i>0.293</i>                    | <i>0.009</i>    | <i>0.440</i>              | <i>0.000</i>    | -0.181                          | 0.110           | <i>-0.283</i>             | <i>0.011</i>    |
| 2008 | <i>0.310</i>                    | <i>0.005</i>    | <i>0.439</i>              | <i>0.000</i>    | -0.213                          | 0.060           | <i>-0.245</i>             | <i>0.030</i>    |
| 2007 | <i>0.325</i>                    | <i>0.003</i>    | <i>0.486</i>              | <i>0.000</i>    | <i>-0.225</i>                   | <i>0.047</i>    | <i>-0.300</i>             | <i>0.007</i>    |
| 2006 | <i>0.320</i>                    | <i>0.004</i>    | <i>0.480</i>              | <i>0.000</i>    | <i>-0.241</i>                   | <i>0.032</i>    | <i>-0.344</i>             | <i>0.002</i>    |
| 2005 | <i>0.315</i>                    | <i>0.005</i>    | <i>0.530</i>              | <i>0.000</i>    | <i>-0.238</i>                   | <i>0.036</i>    | <i>-0.378</i>             | <i>0.001</i>    |
| 2004 | <i>0.331</i>                    | <i>0.003</i>    | <i>0.461</i>              | <i>0.000</i>    | <i>-0.234</i>                   | <i>0.038</i>    | <i>-0.347</i>             | <i>0.002</i>    |
| 2003 | <i>0.334</i>                    | <i>0.003</i>    | <i>0.549</i>              | <i>0.000</i>    | <i>-0.253</i>                   | <i>0.025</i>    | <i>-0.376</i>             | <i>0.001</i>    |

<sup>1</sup>Health ROI was calculated using total treatment cost per million population, disease-specific publications and clinical trials.

**Supplementary Table 2: Research articles dominate MEDLINE database**

| Year | All MEDLINE Articles in English | Research Articles in English | Disease specific correlation (Pearson's coefficient) |
|------|---------------------------------|------------------------------|------------------------------------------------------|
| 2000 | 474,286                         | 456,446                      | 0.9997255                                            |
| 2001 | 488,230                         | 467,303                      | 0.9996532                                            |
| 2002 | 504,244                         | 483,230                      | 0.9996817                                            |
| 2003 | 531,638                         | 509,940                      | 0.9996588                                            |
| 2004 | 574,511                         | 550,694                      | 0.9997459                                            |
| 2005 | 633,146                         | 608,295                      | 0.9997463                                            |
| 2006 | 678,224                         | 654,512                      | 0.9997636                                            |
| 2007 | 716,287                         | 693,163                      | 0.9997397                                            |
| 2008 | 765,184                         | 740,746                      | 0.9997406                                            |
| 2009 | 806,262                         | 781,733                      | 0.9996641                                            |
| 2010 | 869,674                         | 845,651                      | 0.9996908                                            |
| 2011 | 943,258                         | 921,154                      | 0.9996521                                            |

**Supplementary Table 3: Summary Statistics of University of Chicago Hospital Data**

|                           | <=65   |                | >65    |                | All Ages |                |
|---------------------------|--------|----------------|--------|----------------|----------|----------------|
|                           | N      | % ( $\sigma$ ) | N      | % ( $\sigma$ ) | N        | % ( $\sigma$ ) |
| <b>Gender</b>             |        |                |        |                |          |                |
| Female                    | 67,964 | 56.49 (0.14)   | 15,213 | 57.01 (0.30)   | 83,177   | 56.59 (0.13)   |
| Male                      | 52,332 | 43.50 (0.14)   | 11,473 | 42.99 (0.30)   | 63,805   | 43.41 (0.13)   |
| Unknown                   | 7      | 0.01 (0.00)    | 0      | 0.00 (0.00)    | 7        | 0.00 (0.00)    |
| <b>Age groups (years)</b> |        |                |        |                |          |                |
| 0-17                      | 33,185 | 27.58 (0.13)   | -      | -              | 33,185   | 22.58 (0.11)   |
| 18-33                     | 31,191 | 25.93 (0.13)   | -      | -              | 31,191   | 21.22 (0.11)   |
| 34-49                     | 26,672 | 22.17 (0.12)   | -      | -              | 26,672   | 18.15 (0.10)   |
| 50-65                     | 29,255 | 24.32 (0.12)   | -      | -              | 29,255   | 19.90 (0.10)   |
| 66-72                     | -      | -              | 10,381 | 38.90 (0.30)   | 10,381   | 7.06 (0.07)    |
| 73-79                     | -      | -              | 8,060  | 30.20 (0.28)   | 8,060    | 5.48 (0.06)    |
| 80-86                     | -      | -              | 5,174  | 19.39 (0.24)   | 5,174    | 3.52 (0.05)    |
| >86                       | -      | -              | 3,071  | 11.51 (0.20)   | 3,071    | 2.09 (0.04)    |
| <b>Disease Name</b>       |        |                |        |                |          |                |
| Essential hypertension    | 17,544 | 14.58          | 17,195 | 64.44          | 34,739   | 23.63          |
| Type 2 diabetes           | 6,431  | 5.35           | 6,954  | 26.06          | 13,385   | 9.11           |
| Asthma                    | 10,366 | 8.62           | 1,892  | 7.09           | 12,258   | 8.34           |
| Depression                | 6,218  | 5.17           | 3,203  | 12.00          | 9,421    | 6.41           |
| Benign neoplasm of colon  | 3,683  | 3.06           | 4,281  | 16.04          | 7,964    | 5.42           |
| Congestive heart failure  | 3,008  | 2.50           | 4,093  | 15.34          | 7,101    | 4.83           |
| Insomnia                  | 1,856  | 1.54           | 1,200  | 4.50           | 3,056    | 2.08           |
| Alzheimer's disease       | 42     | 0.04           | 884    | 3.31           | 926      | 0.63           |
| Autism                    | 330    | 0.27           | 1      | 0.00           | 331      | 0.23           |
| Chlamydia                 | 102    | 0.09           | 0      | 0.00           | 102      | 0.07           |

**Supplementary Table 4: Summary Statistics of National Inpatient Samples Data**

|                           | <=65      |              | >65       |              | All Ages  |              |
|---------------------------|-----------|--------------|-----------|--------------|-----------|--------------|
| <b>Gender</b>             | <b>N</b>  | <b>% (σ)</b> | <b>N</b>  | <b>% (σ)</b> | <b>N</b>  | <b>% (σ)</b> |
| Female                    | 3,069,299 | 56.91 (0.03) | 1,572,457 | 58.48 (0.02) | 4,641,756 | 57.94 (0.02) |
| Male                      | 2,178,706 | 43.08 (0.03) | 1,190,265 | 41.51 (0.02) | 3,368,971 | 42.05 (0.02) |
| Unknown                   | 436       | 0.00 (0.00)  | 129       | 0.01 (0.00)  | 565       | 0.01 (0.00)  |
| <b>Age groups (years)</b> | <b>N</b>  | <b>% (σ)</b> | <b>N</b>  | <b>% (σ)</b> | <b>N</b>  | <b>% (σ)</b> |
| 0-17                      | 1,182,494 | 22.53 (0.02) | -         | -            | 1,182,494 | 14.76 (0.01) |
| 18-33                     | 1,233,415 | 23.50 (0.02) | -         | -            | 1,233,415 | 15.40 (0.01) |
| 34-49                     | 1,126,315 | 21.46 (0.02) | -         | -            | 1,126,315 | 14.06 (0.01) |
| 50-65                     | 1,706,217 | 32.51 (0.02) | -         | -            | 1,706,217 | 21.30 (0.01) |
| 66-72                     | -         | -            | 813,070   | 29.43 (0.03) | 813,070   | 10.15 (0.01) |
| 73-79                     | -         | -            | 741,313   | 26.83 (0.03) | 741,313   | 9.25 (0.01)  |
| 80-86                     | -         | -            | 702,480   | 25.43 (0.03) | 702,480   | 8.77 (0.01)  |
| >86                       | -         | -            | 505,988   | 18.31 (0.02) | 505,988   | 6.32 (0.01)  |
| <b>Disease Name</b>       | <b>N</b>  | <b>%</b>     | <b>N</b>  | <b>%</b>     | <b>N</b>  | <b>%</b>     |
| Essential hypertension    | 8,715     | 0.166        | 6,458     | 0.234        | 15,173    | 0.189        |
| Type 2 diabetes           | 21,976    | 0.419        | 17,484    | 0.633        | 39,460    | 0.493        |
| Asthma                    | 3,096     | 0.059        | 976       | 0.035        | 4,072     | 0.051        |
| Depression                | 20,311    | 0.387        | 1,187     | 0.043        | 21,498    | 0.268        |
| Benign neoplasm of colon  | 3,578     | 0.068        | 3,709     | 0.134        | 7,287     | 0.091        |
| Congestive heart failure  | 16,934    | 0.323        | 43,652    | 1.580        | 60,586    | 0.756        |
| Insomnia                  | 32        | 0.001        | 33        | 0.001        | 65        | 0.001        |
| Alzheimer's disease       | 580       | 0.011        | 12,692    | 0.459        | 13,272    | 0.166        |
| Autism                    | 657       | 0.013        | 2         | 0.000        | 659       | 0.008        |
| Chlamydia                 | 48        | 0.001        | 0         | 0.000        | 48        | 0.001        |

**Supplementary Table 5: Top 50 over/under studied conditions in 2011**

**Top 50 over studied conditions in 2011**

| Name                                                            | Short Name                             |
|-----------------------------------------------------------------|----------------------------------------|
| Breast cancer                                                   | breast cancer                          |
| Cervical cancer and dysplasia                                   | cervical cancer dysplasia              |
| Other symptoms of respiratory system                            | other Sx of respiratory system         |
| Renal failure                                                   | renal failure                          |
| Cardiac arrest and ventricular fibrillation                     | cardiac arrest & VF                    |
| Ischemic Heart Disease                                          | IHD                                    |
| Cardiac dysrhythmias                                            | arrhythmia                             |
| Peptic ulcer (excl. esophageal)                                 | peptic ulcer                           |
| Male infertility and abnormal spermatozoa                       | male infertility & abnormal sperm      |
| Cholelithiasis and cholecystitis                                | cholelithiasis & cholecystitis         |
| Benign mammary dysplasias                                       | mammary dysplasias                     |
| Otitis media and Eustachian tube disorders                      | otitis media & ETD                     |
| Gastrointestinal hemorrhage                                     | GI bleeding                            |
| Gastritis and duodenitis                                        | gastritis/duodenitis                   |
| Inflammatory diseases of prostate                               | inflammatory disease of prostate       |
| Intestinal malabsorption                                        | GI malabsorption                       |
| Cardiomyopathy                                                  | cardiomyopathy                         |
| Nephritis and nephropathy without mention of glomerulonephritis | membranoprolif nephr NOS               |
| Chronic liver disease and cirrhosis                             | chronic liver disease/cirrhosis        |
| Iron deficiency anemias                                         | iron deficiency anemia                 |
| Cystitis and urethritis                                         | cystitis & urethritis                  |
| Proteinuria                                                     | proteinuria                            |
| Peripheral vascular disease                                     | PVD                                    |
| Poisoning by antifungal antibiotics                             | Pois-antifungal antibiot               |
| Disorders of carbohydrate transport and metabolism              | carbohydrate transport & metabolism DO |
| Nephritis; nephrosis; renal sclerosis                           | nephritis/nephrosis /renal sclerosis   |
| Gout and other crystal arthropathies                            | gout & other crystal arthropathies     |
| Cancer of bone and connective tissue                            | sarcomas                               |
| Erythematous conditions                                         | erythematous conditions                |
| Osteomyelitis                                                   | osteomyelitis                          |
| Sepsis and SIRS                                                 | SIRS                                   |
| Suicidal ideation or attempt                                    | suicidal ideation or attempt           |
| Chronic ulcer of skin                                           | chronic skin ulcer                     |
| Poisoning by hormones and synthetic substitutes                 | poisoning hormon NEC/NOS               |
| Other disorders of pancreatic internal secretion                | pancreatic DO NEC                      |
| Diabetes mellitus                                               | diabetes                               |
| Psoriasis and related disorders                                 | psoriasis & related DO                 |
| Disorders of protein plasma/amino-acid transport and metabolism | amino acid transport & metabolism DO   |



Adverse effects of antibacterials (not penicillins)  
 Disorders of lipid metabolism  
 Osteoarthritis  
 Nephritis and nephropathy in diseases classified elsewhere  
 Diverticulosis and diverticulitis  
 Sulfonamides  
 Atrial fibrillation and flutter  
 Hypertension  
 Injury to other and unspecified nerves  
 Other biliary tract disease  
 Lung disease due to external agents  
 Secondary diabetes mellitus

antibiotics side effect  
 lipid metabolism DO  
 OA  
 Nephritis NOS in oth dis  
 diverticulosis & diverticulitis  
 sulfonamides side effects  
 atrial fibrillation or flutter  
 hypertension  
 nerve injury NEC  
 other biliary tract disease  
 lung disease due to external agents  
 secondary diabetes

**Top 50 under studied conditions in 2011**

**Name**

Chronic lymphocytic thyroiditis  
 Other disorders of cervical region  
 Palpitations  
 Secondary malignancy of bone  
 Mixed hyperlipidemia  
 Septal Deviations/Turbinate Hypertrophy  
 Fluid overload  
 Adjustment reaction  
 Cervical radiculitis  
 Diarrhea  
 Other signs and symptoms involving emotional state  
 Irregular menstrual cycle/bleeding  
 Joint effusions  
 Galactorrhea  
 Contracture of joint  
 Seborrhic keratosis  
 Testicular hypofunction  
 Dysuria  
 Symptoms involving female genital tract  
 Abnormality of gait  
 Elevated sedimentation rate  
 Umbilical cord complications during labor and delivery  
 Hammer toe (acquired)  
 Costochondritis  
 Muscle weakness  
 Polydipsia  
 Multiple gestation

**Short Name**

hashimoto's thyroiditis  
 other cervical DO  
 palpitation  
 secondary bone cancer  
 hyperlipidaemia  
 septal deviations/turbinate hypertrophy  
 hypervolemia  
 adjustment reaction  
 cervical radiculitis  
 Diarrhea  
 Nervousness  
 irregular period  
 joint effusion  
 Galactorrhea  
 joint contracture  
 seborrhoeic wart  
 testicular hypofunction  
 Dysuria  
 Sx of female genital tract  
 gait abnormality  
 elevated sed rate  
 umbilical cord complications at labor  
 hammer toe  
 Costochondritis  
 Myasthenia  
 Polydipsia  
 multiple birth

Diverticulitis  
Sebacous cyst  
Acne  
Changes in skin texture  
Postmenopausal atrophic vaginitis  
Colles' fracture  
Otagia  
Ascites (non malignant)  
Voice disturbance  
Hyperglyceridemia  
Normal delivery  
Lipoma of skin and subcutaneous tissue  
Sacroiliitis NEC  
Other dyschromia  
Chronic inflammatory pelvic disease  
Hematuria  
Other persistent mental disorders due to conditions  
classified elsewhere  
Abnormal results of function study of liver  
Other disorders of the kidney and ureters  
Calculus of ureter  
Microscopic hematuria  
Heart transplant/surgery

Diverticulitis  
sebaceous cyst  
Acne  
skin texture change  
atrophic vaginitis  
colles fracture  
Otagia  
Ascites  
voice disturbance  
Hyperglyceridemia  
normal delivery  
lipoma of skin & subcutaneous tissue  
Sacroiliitis  
other dyschromia  
chronic PID  
Hematuria  
  
Mental disor NEC  
abn LFT  
other kidney/ureter DO  
ureteric calculus  
microscopic hematuria  
Hrt dis postcardiac surg

**Supplementary Figure 1:** Dependence of burden of disease (measured by total treatment cost per million population) at year  $t$  ( $Burden_t$ ), number of disease-specific publications published during year  $t$  ( $Publication_t$ ), and disease-specific clinical trials initiated during year  $t$  ( $Trial_t$ ) on values of these three quantities in the previous year ( $t-1$ ), two years earlier ( $t-2$ ), ..., ten years earlier ( $t-10$ ).

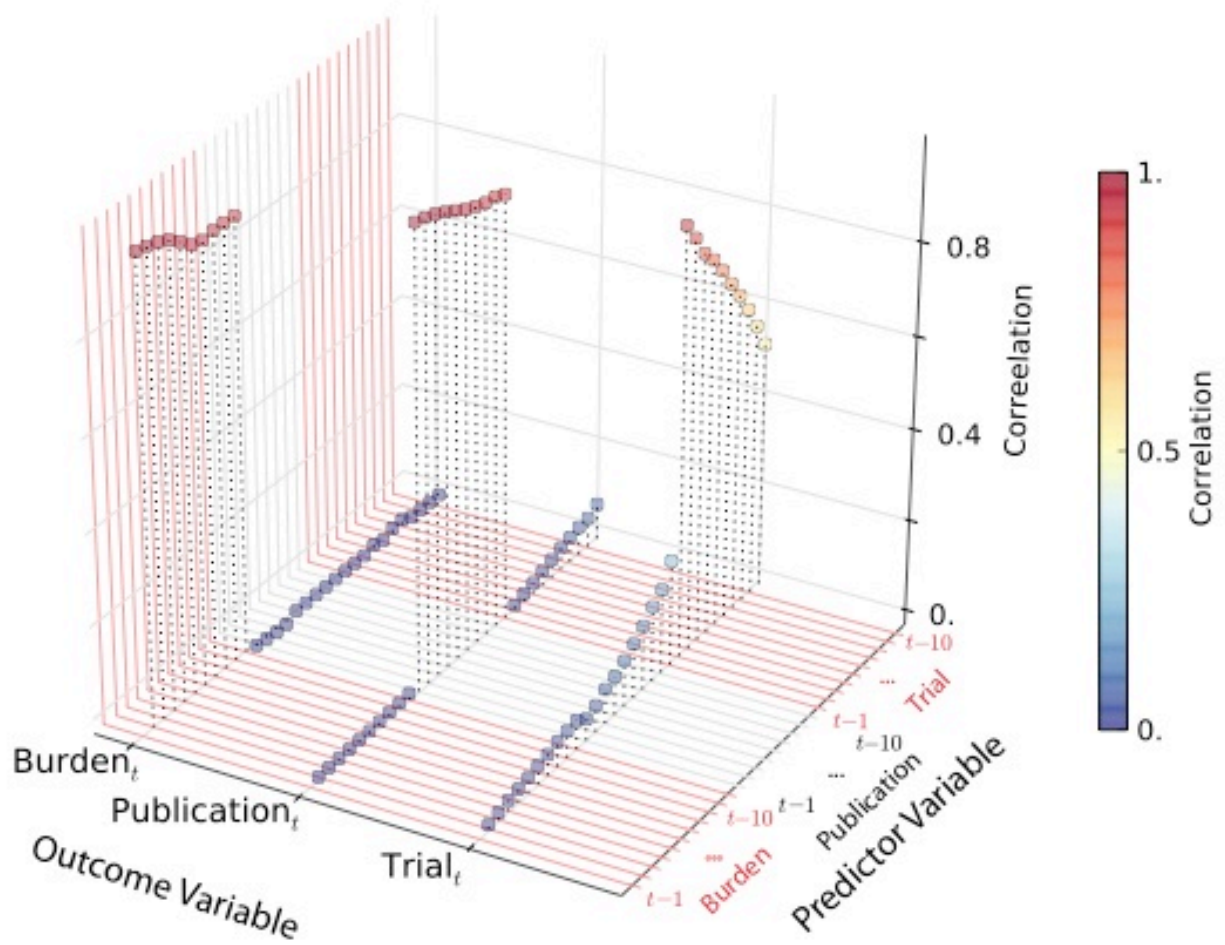

### Supplementary Reference:

1. Denny, J.C. et al. *Bioinformatics* **26**, 1205-1210 (2010).
2. Parzen, E. *The annals of mathematical statistics*, 1065-1076 (1962).
3. Rosenblatt, M. *The Annals of Mathematical Statistics* **27**, 832-837 (1956).
4. Murray, C.J. & Lopez, A.D. *N Engl J Med* **369**, 448-457 (2013).
5. Cimino, J.J., Johnson, S.B., Peng, P. & Aguirre, A. *Proc Annu Symp Comput Appl Med Care*, 730-734 (1993).
